# Supplementary material for: Topical Administration of Lactiplantibacillus plantarum (SkinDuoTM) Serum Improves Anti-Acne Properties
Source: MDPI journal article supplement (doi:10.3390/microorganisms11020417), 2023-02-07
Supplement: s1 [file s1]

# Supplementary Materials:

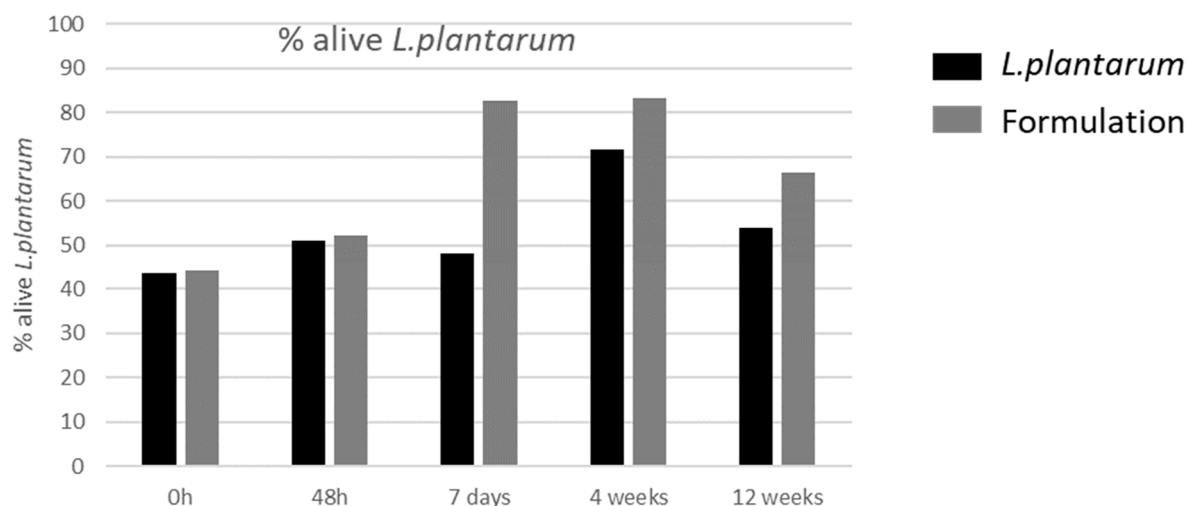

**Figure S1.** Percentage of Alive *L. plantarum* compared to complete formulation over time.

The serum formulation SkinDuo™ was reconstituted with sterile water, after time points: 0 h, 48 h, 7 days, 4 weeks and 12 weeks. For each condition the ratio of the average CFU/reaction value for PMA-qPCR samples over the average CFU/reaction value for Total live bacteria was calculated as ratio of live bacteria for each condition tested.

**Table S1.** Skin irritation patch tested on 25 healthy subjects.

| Sample | Sex | Erythema 15' | Oedema 15' | Erythema 1h | Oedema 1h | Erythema 24h | Oedema 24h |
|--------|-----|--------------|------------|-------------|-----------|--------------|------------|
| 1      | m   | 0            | 0          | 0           | 0         | 0            | 0          |
| 2      | f   | 0            | 0          | 1           | 0         | 1            | 0          |
| 3      | m   | 0            | 0          | 0           | 0         | 0            | 0          |
| 4      | f   | 0            | 0          | 0           | 0         | 0            | 0          |
| 5      | f   | 0            | 0          | 0           | 0         | 0            | 0          |
| 6      | f   | 0            | 0          | 0           | 0         | 0            | 0          |
| 7      | m   | 0            | 0          | 0           | 0         | 0            | 0          |
| 8      | f   | 0            | 0          | 0           | 0         | 0            | 0          |
| 9      | f   | 0            | 0          | 0           | 0         | 0            | 0          |
| 10     | f   | 0            | 0          | 0           | 0         | 0            | 0          |
| 11     | f   | 0            | 0          | 0           | 0         | 0            | 0          |
| 12     | m   | 0            | 0          | 0           | 0         | 0            | 0          |
| 13     | m   | 0            | 0          | 0           | 0         | 0            | 0          |
| 14     | m   | 0            | 0          | 0           | 0         | 0            | 0          |
| 15     | f   | 0            | 0          | 1           | 0         | 0            | 0          |
| 16     | f   | 0            | 0          | 0           | 0         | 0            | 0          |
| 17     | m   | 0            | 0          | 0           | 0         | 0            | 0          |
| 18     | m   | 0            | 0          | 0           | 0         | 0            | 0          |
| 19     | m   | 0            | 0          | 0           | 0         | 0            | 0          |
| 20     | f   | 0            | 0          | 0           | 0         | 0            | 0          |
| 21     | f   | 0            | 0          | 0           | 0         | 0            | 0          |
| 22     | f   | 0            | 0          | 0           | 0         | 0            | 0          |
| 23     | m   | 0            | 0          | 0           | 0         | 0            | 0          |
| 24     | m   | 0            | 0          | 0           | 0         | 0            | 0          |
| 25     | f   | 0            | 0          | 0           | 0         | 0            | 0          |

**Table S2.** *L. plantarum* viability as CFU/mL on hyposkin® models after SkinDuo™ treatment for two independent experiments in triplicates, showing the mean and SD in CFU/mL. One vial was used and tested for SkinDuo™ n=1, n=2 tested at times 0 h, 8 h, 24 h and 48 h.

| Serum Skin Duo™ | n=1                    |                        |                        | n=2                    |                        |                        | Mean/CFU/mL            | SD       |
|-----------------|------------------------|------------------------|------------------------|------------------------|------------------------|------------------------|------------------------|----------|
| Time            | 5.56 x 10 <sup>6</sup> | 6.12 x 10 <sup>6</sup> | 5.64 x 10 <sup>6</sup> | 5.56 x 10 <sup>6</sup> | 6.12 x 10 <sup>6</sup> | 5.64 x 10 <sup>6</sup> | 5.77 x 10 <sup>6</sup> | 247296.5 |
| 0 h             | 3.54 x 10 <sup>6</sup> | 3.70x 10 <sup>6</sup>  | 4.06x 10 <sup>6</sup>  | 5.22x 10 <sup>6</sup>  | 4.60x 10 <sup>6</sup>  | 4.82x 10 <sup>6</sup>  | 4.32 x 10 <sup>6</sup> | 605355.7 |
| 8 h             | 2.00 x 10 <sup>6</sup> | 3.20 x 10 <sup>6</sup> | 3.50 x 10 <sup>6</sup> | 2.60 x 10 <sup>5</sup> | 3.62 x 10 <sup>6</sup> | 2.00 x 10 <sup>6</sup> | 2.43 x 10 <sup>6</sup> | 1171367  |
| 24 h            | 3.36 x 10 <sup>6</sup> | 4.32 x 10 <sup>6</sup> | 3.50 x 10 <sup>6</sup> | 1.64 x 10 <sup>7</sup> | 1.83 x 10 <sup>7</sup> | 1.42 x 10 <sup>7</sup> | 1.00 x 10 <sup>7</sup> | 6415278  |
| 48 h            | 1.64 x 10 <sup>7</sup> | 1.74 x 10 <sup>7</sup> | 1.91 x 10 <sup>7</sup> | 2.15 x 10 <sup>7</sup> | 1.28 x 10 <sup>7</sup> | 1.37 x 10 <sup>7</sup> | 1.68 x 10 <sup>7</sup> | 2991174  |
